# Supplementary material
Source: PubMed Central journal article supplement (PMC3035688)
Supplement: supp_M010603_jlr.M010603-1.pdf [file supp_M010603_jlr.M010603-1.pdf]

# Supplemental Figure 1

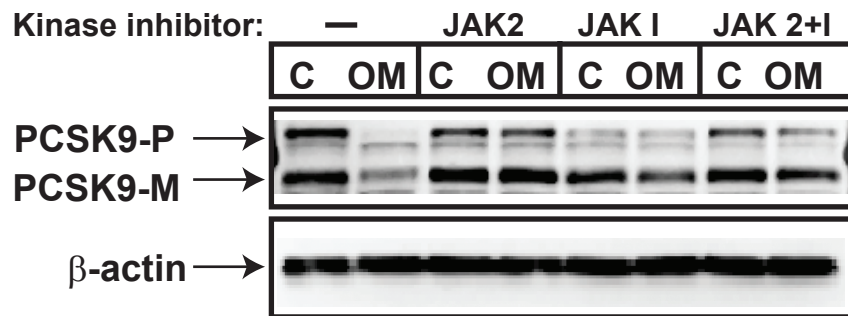

## Supplemental Figure 2

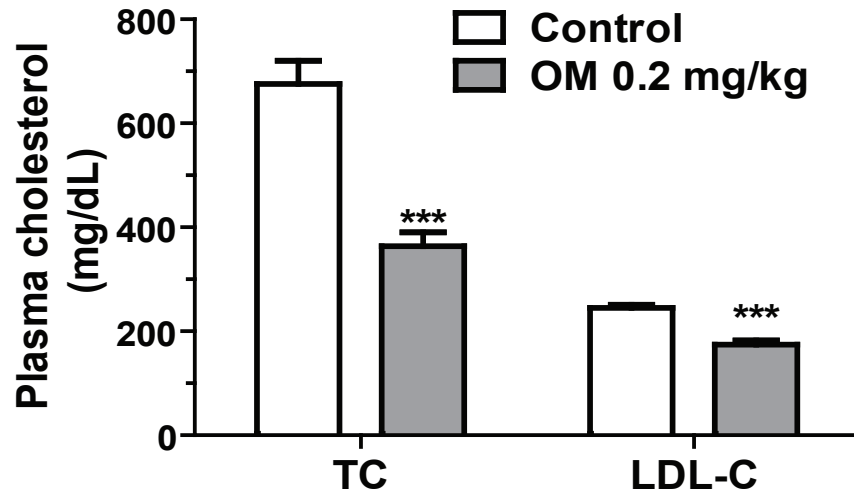

## Supplemental Figure 3

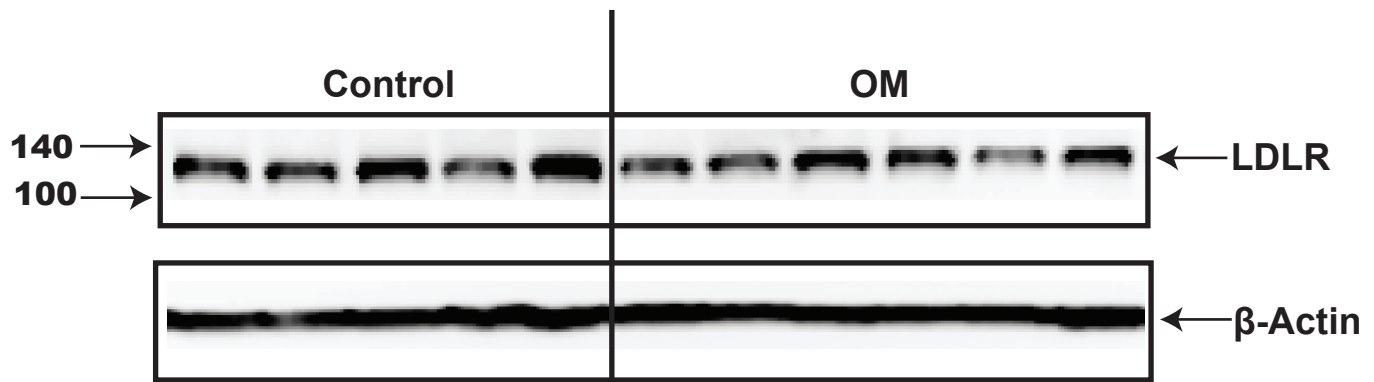

## Supplemental Figure Legends

**Supplemental Figure 1. The effects of combined JAK inhibitors on the suppression of PCSK9 protein expression by OM.** HepG2 cells were preincubated for 2 h with JAK2 inhibitor (AG 100  $\mu\text{M}$ ), JNK I (5  $\mu\text{M}$ ), or the combination of JAK2 and JAK I prior to the OM treatment of 24 h. Total cell lysates were harvested for western blotting to detect PCSK9.

**Supplemental Figure 2. Reduction of serum levels of total cholesterol (TC) and LDL-C by OM treatment.** Hamsters on a cholesterol-enriched diet were administered PBS as the vehicle (C) or 0.2 mg/kg/day of OM for 8 days. The serum samples were collected 24 hours after the last treatment. Individual serum values (mean  $\pm$  SD, n=7) of TC and LDL-C were measured using commercial kits. \*\*\* $P < 0.001$  as compared to vehicle control.

**Supplemental Figure 3. Western blot analysis of liver LDLR protein in control and OM-treated hamsters.** Individual liver protein extracts from the control group and the OM-treated group were analyzed for LDLR protein expression by western blotting using rabbit anti-human LDLR antibody. Arrows indicate the molecular weight of markers (140 kDa and 100 kDa).

Supplemental Table 1.

The primer sequences of sense and antisense strands for real time PCR and cloning

| Primer name                        | Forward primer             | Reverse primer            |
|------------------------------------|----------------------------|---------------------------|
| The human primer sequences were:   |                            |                           |
| LDLR                               | 5'-gacgtggcgtgaacatctg     | 5'-ctggcaggcaatgctttgg    |
| PCSK9                              | 5'-aggggaggacatcattggtg    | 5'-caggttgggggtcagtacc    |
| JAK1                               | 5'-gtcctttgtgtccctgtaga    | 5'-tatgttgggacgatcaacgg   |
| JAK2                               | 5'-aagaaaacgatcaaaccctact  | 5'-tgcattggctgaattgctgaa  |
| STAT1                              | 5'-aggaaaagcaagcgtaatcttca | 5'-tattccccgactgagcctgat  |
| STAT3                              | 5'-tatgcgccagcaaagaatca    | 5'-cgggcaatctccattggct    |
| STAT5a                             | 5'-cgggctggaactacaccttc    | 5'-ggcctgttcttattcaciaaac |
| STAT5b                             | 5'-taagaggtcagaccgtcgtgg   | 5'-gctccatgaacgatcacca    |
| GAPDH                              | 5'-atggggaaggtgaaggtcg     | 5'-ggggtcattgatggcaacaata |
| The hamster primer sequences were: |                            |                           |
| PCSK9                              | 5'-atcctcacaggcctggagtt    | 5'-ctgtgatgacctctggagca   |
| GAPDH                              | 5'-accagaagactgtggatgg     | 5'-cgacatgtgagatccacgac   |
| PCSK9clo*                          | 5'-atgggtaccagctgctctgc    | 5'-tactggtgaaccaggagg     |

\*This pair of primers was used for hamster PCSK9 cloning.
